# Supplementary material
Source: PubMed Central journal article supplement (PMC3044950)

## Supplemental Data

### Supplemental Figure Legends

**Supplemental Fig. 1. RSK2 phosphorylates caspase-8 *in vitro*.** (A) RSK2 phosphorylates caspase-8 *in vitro*. Wildtype His-caspase-8 proteins (5  $\mu$ g) were purified from BL21 bacteria and subjected to an *in vitro* kinase assay with active RSK2 (100 ng) and 10  $\mu$ Ci of [ $\gamma$ - $^{32}$ P] ATP and 50  $\mu$ M unlabeled ATP. The reaction mixture was resolved by 10% SDS-PAGE and the phosphorylated caspase-8 was visualized by autoradiography. (B) Amino acid sequences for peptide synthesis. (C) Identification of the RSK2 phospho-target amino acid of caspase-8. Peptides (5  $\mu$ g) synthesized in B were used for an *in vitro* kinase assay with active RSK2 (100 ng) and 10  $\mu$ Ci of [ $\gamma$ - $^{32}$ P] ATP and 50  $\mu$ M unlabeled ATP. The reaction mixture was resolved by 20% SDS-PAGE and phosphorylated caspase-8 was visualized by autoradiography. (D) Mutant caspase-8-T263A, but not mutants S119A or S256A, affects caspase-8 phosphorylation *in vitro* as determined by Western blot. An *in vitro* kinase assay was performed with caspase-8-wt or caspase-8 mutants together with active RSK2 (100 ng) and 200  $\mu$ M unlabeled ATP. The phosphorylated caspase-8 was visualized by Western blot with a p-S/T antibody.

**Supplemental Fig. 2. Overexpression of RSK2 induces caspase-8 degradation.**

(A) RSK2 enhances caspase-8 degradation. RSK2 was transfected into HeLa cells and cells were cultured for 30 h. The cells were treated with cyclohexamide (CHX, 30  $\mu$ g/ml) for the indicated time and proteins were extracted. The caspase-8 protein abundance was visualized by Western blot with a caspase-8 antibody. (B) RSK2 induces caspase-8 degradation through proteosomal-mediated caspase-8 degradation. RSK2 was transfected into HeLa cells and cells cultured for 30 h. The cells were pre-treated with MG-132 (20  $\mu$ M) for 1 h and then treated with CHX (30  $\mu$ g/ml). The caspase-8 protein level was visualized by Western blot using a caspase-8 antibody.

**Supplemental Fig. 3. Phosphorylation of Thr263 plays an important role in caspase-8 ubiquitination.** HeLa cells were co-transfected with caspase-8, caspase-8-S119A, caspase-8-S256A, or caspase-8-T263A along with HA-Ub and RSK2. Transfected cells were cultured for 30 h and then proteins were extracted. The caspase-8 proteins were immunoprecipitated with anti-V5 and the ubiquitinated caspase-8 proteins were visualized by Western blot with anti-HA.

**Supplemental Fig. 4. Fas induces significant apoptosis in Jurkat A3 cells**

Jurkat A3 cells were exposed to anti-Fas (200 ng/ml) for 6 h and then subjected to apoptosis analysis by Annexin V and propidium iodide (PI) staining using flow cytometry (bottom). Data are represented as means  $\pm$  S.D. of the percent Annexin V positive cells

determined from triplicate experiments. The asterisk (\*) indicates a significant difference ( $p < 0.05$  Student's t test; bottom).

# Supplementary Figure 1 A-C

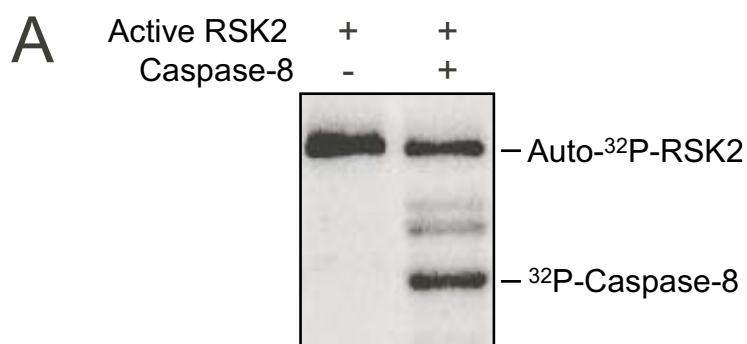

**B**

| Peptide number | Position | Score | Mutation    | Sequence                                    |
|----------------|----------|-------|-------------|---------------------------------------------|
| #1             | S21      | 0.901 |             | EDLA <u>S</u> LKFLDYIP                      |
| #2             | T92      | 0.955 |             | EEMERELQ <u>T</u> PGRAQI                    |
| #3             | S113     | 0.996 | S115A,S119A | EEV <u>S</u> RAELRA <u>F</u> KFLL           |
| #4             | S115     | 0.938 | S113A,S119A | EEV <u>A</u> R <u>S</u> ELRA <u>F</u> KFLL  |
| #5             | S119     | 0.974 | S113A,S115A | EEV <u>A</u> RAELR <u>S</u> FKFLL           |
| #6             | S182     | 0.994 |             | LLKIINDYEEF <u>S</u> KER                    |
| #7             | S187     | 0.997 | S118A,S192A | AKERA <u>S</u> ALEG <u>A</u> PDEF           |
| #8             | S188     | 0.997 | S187A,S192A | AKERA <u>A</u> <u>S</u> LEG <u>A</u> PDEF   |
| #9             | S192     | 0.99  | S187A,S188A | AKERA <u>A</u> ALEG <u>S</u> PDEF           |
| #10            | S211     | 0.998 |             | LCGVMAIAD <u>S</u> PREQD                    |
| #11            | S217     | 0.982 |             | PREQD <u>S</u> EAQALDKVY                    |
| #12            | S256     | 0.959 |             | REKVPKLH <u>S</u> IRDRNG                    |
| #13            | T263     | 0.806 |             | <u>I</u> RDRNG <u>T</u> HLDAGALA (RXRXXS/T) |
| #14            | S375     | 0.981 |             | GIPVEAD <u>S</u> EEQPYLE                    |
| #15            | S451     | 0.985 |             | EVNYEV <u>S</u> NKDDKKNM                    |

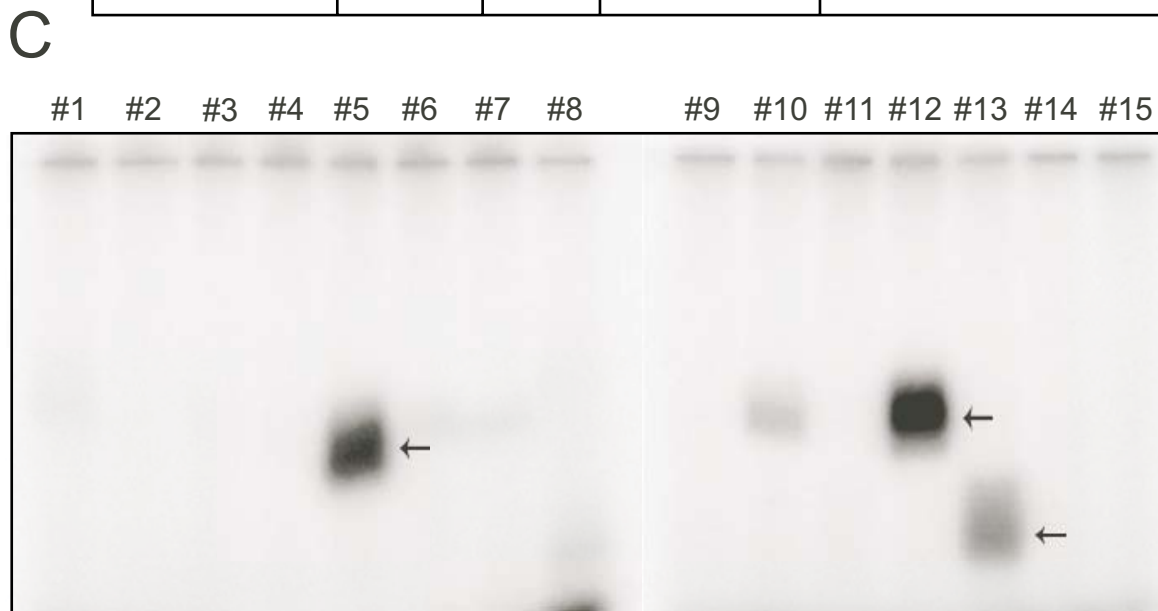

# Supplementary Figure 1D

D

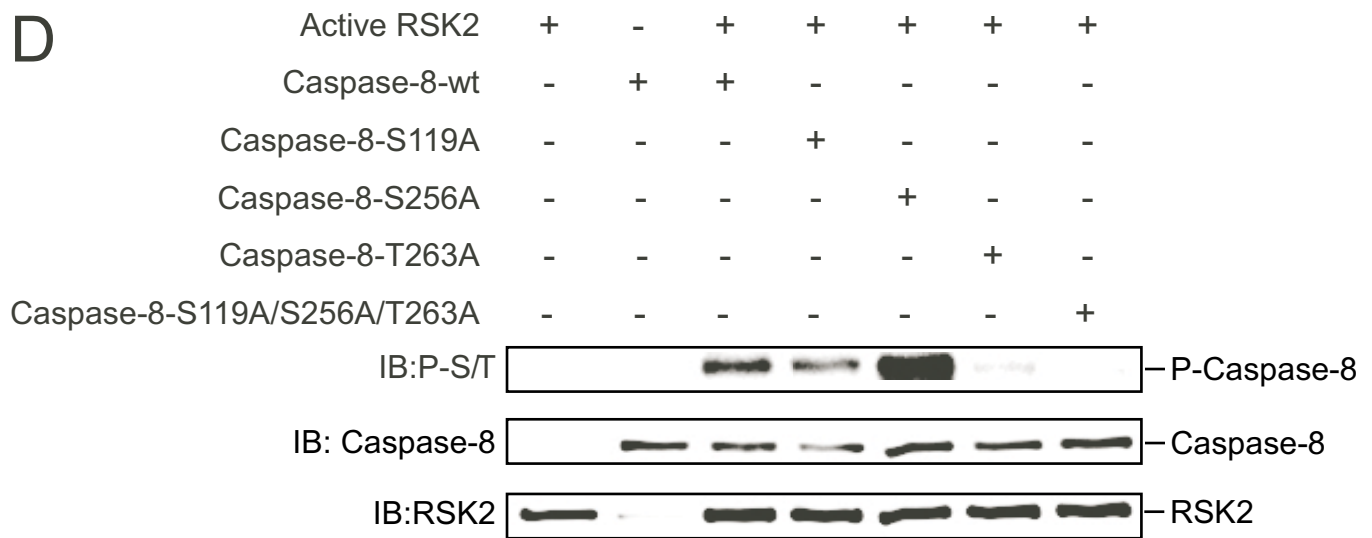

# Supplementary Figure 2 A-B

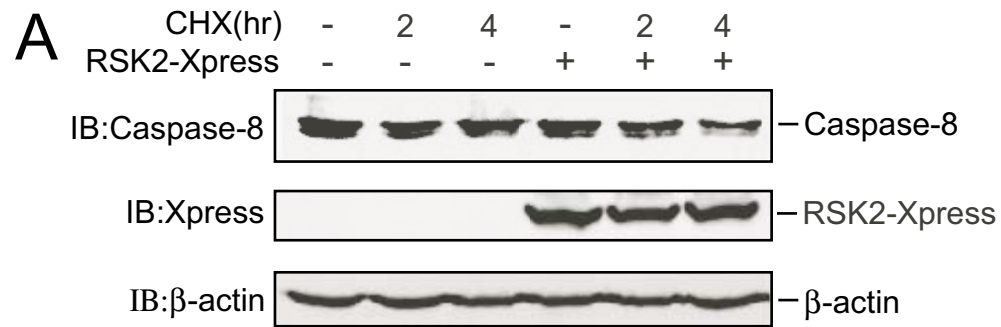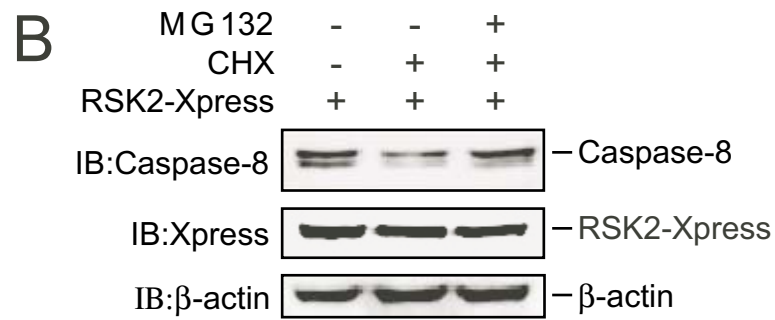

# Supplementary Figure 3

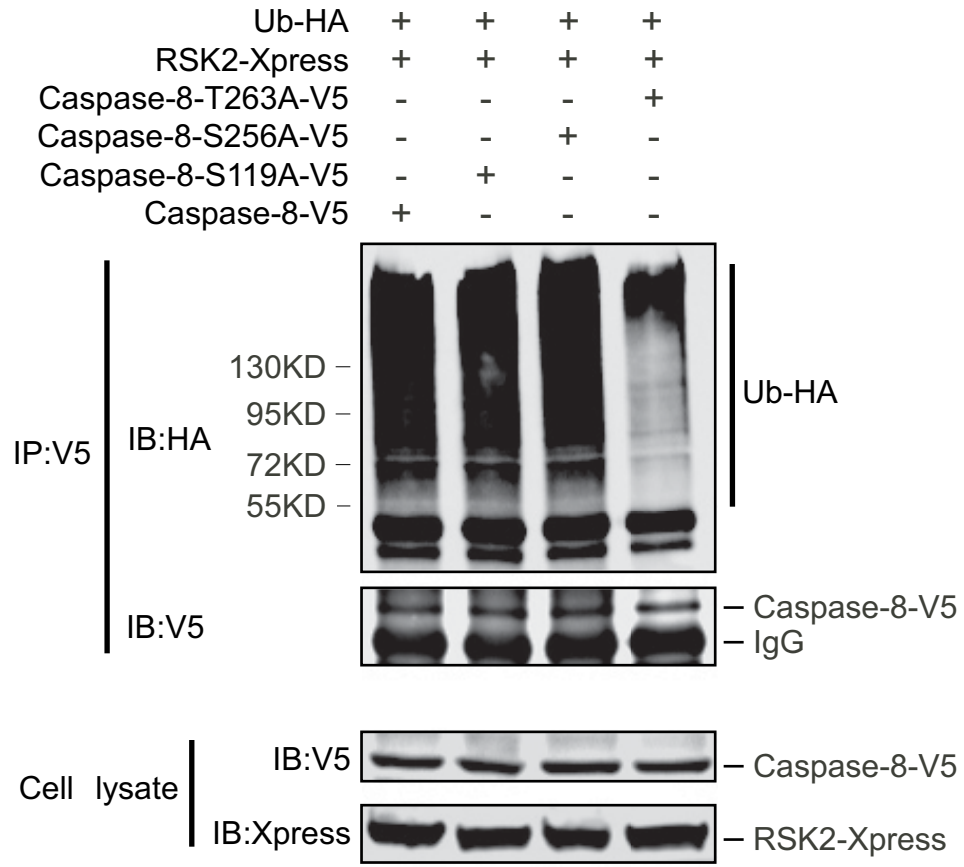

# Supplementary Figure 4

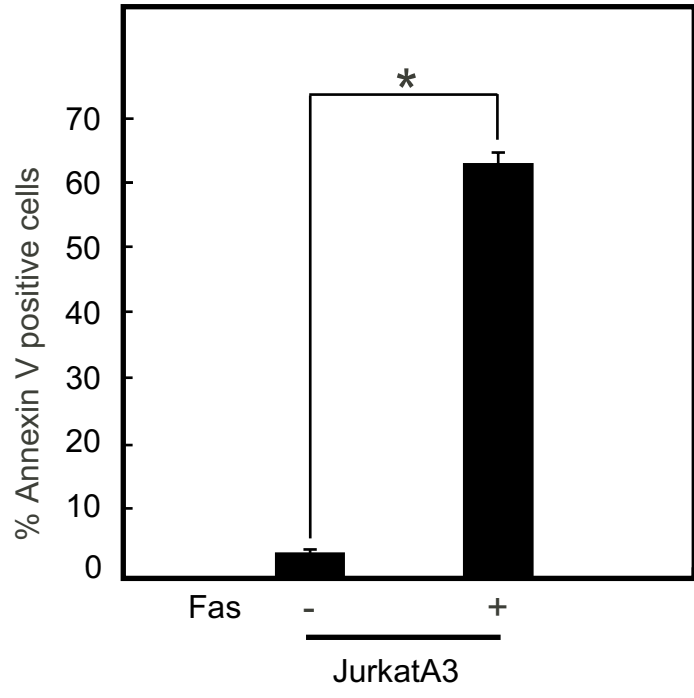

Supplement: supp_M110.172338_jbc.M110.172338-1.pdf [file supp_M110.172338_jbc.M110.172338-1.pdf]
